# Supplementary material for: Dietary Fatty Acid Composition Impacts the Fatty Acid Profiles of Different Regions of the Bovine Brain
Source: MDPI journal article supplement (doi:10.3390/ani12192696), 2022-10-07
Supplement: s1 [file s1]

**Table S1.** Fatty acid profiles for bovine amygdala, hippocampus, and mid tectum.

| Region/tract:           | Amygdala                                     |       |                  | Hippocampus |       |        | Mid tectum |       |        |
|-------------------------|----------------------------------------------|-------|------------------|-------------|-------|--------|------------|-------|--------|
| Supplement:             | Fish                                         | Palm  | SEM <sup>a</sup> | Fish        | Palm  | SEM    | Fish       | Palm  | SEM    |
| Fatty acid <sup>b</sup> | (mg fatty acid/ 100 mg of total fatty acids) |       |                  |             |       |        |            |       |        |
| C14:0                   | 0.69                                         | 0.67  | 0.02             | 0.62        | 0.61  | 0.03   | 0.41       | 0.37  | 0.03   |
| C16:0                   | 20.89                                        | 20.77 | 0.21             | 19.42       | 19.35 | 0.27   | 16.65      | 16.74 | 0.43   |
| C16:1 n-7               | 0.53                                         | 0.48  | 0.02*            | 0.46        | 0.42  | 0.02   | 0.42       | 0.38  | 0.02   |
| C17:0                   | 0.35                                         | 0.39  | 0.02             | 0.42        | 0.43  | 0.01   | 0.53       | 0.53  | 0.01   |
| C18:0                   | 21.76                                        | 21.37 | 0.200            | 20.64       | 20.52 | 0.16   | 19.30      | 19.14 | 0.34   |
| C18:1 n-9               | 18.56                                        | 18.73 | 0.50             | 22.00       | 21.12 | 0.51   | 26.61      | 26.94 | 1.01   |
| C18:1 n-7               | 3.95                                         | 4.05  | 0.04             | 4.47        | 4.39  | 0.07   | 5.39       | 5.91  | 0.16*  |
| C18:2 n-6               | 0.40                                         | 0.36  | 0.02             | 0.43        | 0.36  | 0.03   | 0.34       | 0.29  | 0.03   |
| C18:3 n-3               | 0.10                                         | 0.07  | 0.02             | 0.11        | 0.13  | 0.02   | 0.23       | 0.22  | 0.02   |
| C20:0                   | 0.16                                         | 0.14  | 0.014            | 0.20        | 0.20  | 0.02   | 0.33       | 0.35  | 0.02   |
| C20:1 n-9               | 0.90                                         | 1.15  | 0.100            | 1.83        | 1.82  | 0.15   | 3.01       | 3.34  | 0.24   |
| C20:2 n-6               | 1.01                                         | 0.92  | 0.07             | 1.78        | 1.37  | 0.12*  | 0.63       | 0.55  | 0.03   |
| C20:3 n-6               | 0.54                                         | 0.58  | 0.07             | 1.05        | 0.92  | 0.08   | 1.00       | 0.81  | 0.04** |
| C20:4 n-6               | 7.94                                         | 8.89  | 0.22**           | 5.95        | 7.51  | 0.26** | 5.26       | 5.36  | 0.41   |
| C20:5 n-3               | 0.68                                         | 0.28  | 0.04**           | 0.57        | 0.29  | 0.03** | 0.33       | 0.21  | 0.02** |
| C22:0                   | 0.12                                         | 0.12  | 0.02             | 0.24        | 0.24  | 0.02   | 0.49       | 0.57  | 0.04   |
| C22:1 n-9               | 0.88                                         | 0.97  | 0.08             | 1.87        | 1.61  | 0.11   | 0.61       | 0.62  | 0.04   |
| C22:4 n-6               | 4.29                                         | 5.88  | 0.13**           | 3.12        | 4.86  | 0.14** | 3.79       | 5.16  | 0.18** |
| C22:5 n-3               | 2.76                                         | 1.12  | 0.09**           | 2.03        | 0.90  | 0.07** | 2.08       | 0.85  | 0.10** |
| C22:6 n-3               | 11.84                                        | 10.68 | 0.36*            | 9.75        | 9.26  | 0.30   | 8.06       | 8.22  | 0.39   |

<sup>a</sup>Standard error of the mean, n=10, five steers and five heifers.

<sup>b</sup>Number of carbon atoms : number of carbon-carbon double bonds; “n” indicates number of carbon atoms removed from the methyl end to the first carbon-carbon double bond.

\*  $P < 0.05$ ; \*\*  $P < 0.01$ .

**Table S2.** Fatty acid profiles for bovine mid tegmentum, medulla, and pons.

| Region/tract: | Mid tegmentum                                |       |        | Medulla |       |        | Pons  |       |        |
|---------------|----------------------------------------------|-------|--------|---------|-------|--------|-------|-------|--------|
| Supplement:   | Fish                                         | Palm  | SEM    | Fish    | Palm  | SEM    | Fish  | Palm  | SEM    |
| Fatty acid    | (mg fatty acid/ 100 mg of total fatty acids) |       |        |         |       |        |       |       |        |
| C14:0         | 0.36                                         | 0.35  | 0.01   | 0.40    | 0.39  | 0.02   | 0.40  | 0.39  | 0.01   |
| C16:0         | 14.53                                        | 14.59 | 0.20   | 12.72   | 12.07 | 0.41   | 13.46 | 13.62 | 0.20   |
| C16:1 n-7     | 0.28                                         | 0.26  | 0.01   | 0.28    | 0.20  | 0.04   | 0.25  | 0.22  | 0.02   |
| C17:0         | 0.59                                         | 0.56  | 0.01   | 0.67    | 0.64  | 0.03   | 0.65  | 0.59  | 0.02   |
| C18:0         | 19.15                                        | 19.04 | 0.18   | 16.75   | 16.11 | 0.42   | 17.63 | 17.83 | 0.24   |
| C18:1 n-9     | 31.81                                        | 30.63 | 0.31*  | 32.84   | 32.50 | 1.32   | 32.38 | 31.74 | 0.57   |
| C18:1 n-7     | 4.86                                         | 4.91  | 0.07   | 4.15    | 4.10  | 0.11   | 4.44  | 4.51  | 0.08   |
| C18:2 n-6     | 0.22                                         | 0.21  | 0.01   | 0.20    | 0.14  | 0.05   | 0.20  | 0.17  | 0.03   |
| C18:3 n-3     | 0.30                                         | 0.29  | 0.01   | 0.47    | 0.47  | 0.03   | 0.36  | 0.34  | 0.02   |
| C20:0         | 0.42                                         | 0.41  | 0.01   | 0.62    | 0.66  | 0.05   | 0.44  | 0.46  | 0.03   |
| C20:1 n-9     | 5.08                                         | 5.26  | 0.25   | 8.48    | 9.20  | 0.61   | 6.56  | 6.84  | 0.24   |
| C20:2 n-6     | 0.86                                         | 0.81  | 0.04   | 0.64    | 0.75  | 0.03*  | 0.91  | 0.99  | 0.04   |
| C20:3 n-6     | 0.94                                         | 0.91  | 0.04   | 0.95    | 1.02  | 0.06   | 1.01  | 0.92  | 0.03   |
| C20:4 n-6     | 3.88                                         | 4.54  | 0.17*  | 2.35    | 2.37  | 0.26   | 2.96  | 3.57  | 0.10** |
| C20:5 n-3     | 0.32                                         | 0.23  | 0.01** | 0.32    | 0.30  | 0.03   | 0.29  | 0.27  | 0.01   |
| C22:0         | 0.80                                         | 0.85  | 0.05   | 1.41    | 1.55  | 0.11   | 0.88  | 1.03  | 0.08   |
| C22:1 n-9     | 0.95                                         | 1.03  | 0.05   | 0.49    | 0.63  | 0.05   | 0.91  | 1.12  | 0.07*  |
| C22:4 n-6     | 3.60                                         | 5.02  | 0.11** | 1.86    | 2.57  | 0.17** | 2.72  | 3.97  | 0.14** |
| C22:5 n-3     | 1.85                                         | 0.80  | 0.07** | 1.33    | 0.54  | 0.08** | 1.70  | 0.66  | 0.06** |
| C22:6 n-3     | 5.29                                         | 5.05  | 0.26   | 3.57    | 2.33  | 0.73   | 4.10  | 3.72  | 0.11*  |

<sup>a</sup>Standard error of the mean, n=10, five steers and five heifers.

<sup>b</sup>Number of carbon atoms : number of carbon-carbon double bonds; “n” indicates number of carbon atoms removed from the methyl end to the first carbon-carbon double bond.

\*  $P < 0.05$ ; \*\*  $P < 0.01$ .

**Table S3.** Fatty acid profiles for bovine parietal lobe, frontal lobe, and internal capsule.

| Region/tract: | Parietal lobe                                |       |        | Frontal lobe |       |        | Internal capsule |       |        |
|---------------|----------------------------------------------|-------|--------|--------------|-------|--------|------------------|-------|--------|
| Supplement:   | Fish                                         | Palm  | SEM    | Fish         | Palm  | SEM    | Fish             | Palm  | SEM    |
| Fatty acid    | (mg fatty acid/ 100 mg of total fatty acids) |       |        |              |       |        |                  |       |        |
| C14:0         | 0.57                                         | 0.55  | 0.03   | 0.71         | 0.61  | 0.04   | 0.33             | 0.32  | 0.01   |
| C16:0         | 19.21                                        | 19.13 | 0.45   | 20.37        | 18.60 | 0.70   | 13.75            | 13.48 | 0.18   |
| C16:1 n-7     | 0.48                                         | 0.45  | 0.02   | 0.59         | 0.49  | 0.03*  | 0.22             | 0.20  | 0.01   |
| C17:0         | 0.46                                         | 0.46  | 0.02   | 0.43         | 0.40  | 0.02   | 0.62             | 0.62  | 0.01   |
| C18:0         | 21.47                                        | 21.37 | 0.19   | 20.75        | 19.19 | 0.70   | 19.54            | 19.26 | 0.18   |
| C18:1 n-9     | 22.46                                        | 22.03 | 0.83   | 19.47        | 18.76 | 0.77   | 33.05            | 32.57 | 0.40   |
| C18:1 n-7     | 4.37                                         | 4.58  | 0.06*  | 4.11         | 3.94  | 0.14   | 4.49             | 4.55  | 0.09   |
| C18:2 n-6     | 0.49                                         | 0.46  | 0.03   | 0.61         | 0.51  | 0.04   | 0.17             | 0.16  | 0.01   |
| C18:3 n-3     | 0.16                                         | 0.16  | 0.02   | 0.10         | 0.03  | 0.02*  | 0.31             | 0.31  | 0.01   |
| C20:0         | 0.21                                         | 0.20  | 0.01   | 0.10         | 0.26  | 0.12   | 0.37             | 0.37  | 0.01   |
| C20:1 n-9     | 1.96                                         | 2.07  | 0.22   | 1.23         | 1.46  | 0.10   | 5.24             | 5.79  | 0.21   |
| C20:2 n-6     | 0.88                                         | 0.70  | 0.05*  | 0.86         | 0.66  | 0.06*  | 0.87             | 0.84  | 0.04   |
| C20:3 n-6     | 0.75                                         | 0.67  | 0.02*  | 0.77         | 0.62  | 0.05*  | 0.85             | 0.84  | 0.06   |
| C20:4 n-6     | 5.61                                         | 6.41  | 0.25*  | 5.84         | 6.37  | 0.28   | 4.20             | 4.38  | 0.16   |
| C20:5 n-3     | 0.38                                         | 0.17  | 0.03** | 0.36         | 0.11  | 0.04** | 0.29             | 0.19  | 0.03*  |
| C22:0         | 0.31                                         | 0.30  | 0.03   | 0.11         | 0.14  | 0.03   | 0.80             | 0.91  | 0.05   |
| C22:1 n-9     | 1.00                                         | 0.97  | 0.06   | 0.72         | 1.34  | 0.35   | 1.62             | 1.59  | 0.11   |
| C22:4 n-6     | 2.78                                         | 3.89  | 0.09** | 2.50         | 3.61  | 0.14** | 4.02             | 4.89  | 0.12** |
| C22:5 n-3     | 1.79                                         | 0.83  | 0.07** | 2.00         | 0.77  | 0.07** | 1.28             | 0.52  | 0.05** |
| C22:6 n-3     | 12.09                                        | 11.70 | 0.52   | 13.28        | 11.37 | 0.57*  | 3.42             | 2.92  | 0.17*  |

<sup>a</sup>Standard error of the mean, n=10, five steers and five heifers.

<sup>b</sup>Number of carbon atoms : number of carbon-carbon double bonds; “n” indicates number of carbon atoms removed from the methyl end to the first carbon-carbon double bond.

\*  $P < 0.05$ ; \*\*  $P < 0.01$ .

**Table S4.** Fatty acid profiles for bovine caudate, putamen, and cerebellum.

| Region/tract: | Caudate                                   |       |        | Putamen |       |        | Cerebellum |       |        |
|---------------|-------------------------------------------|-------|--------|---------|-------|--------|------------|-------|--------|
| Supplement:   | Fish                                      | Palm  | SEM    | Fish    | Palm  | SEM    | Fish       | Palm  | SEM    |
| Fatty acid    | (mg fatty acid/ 100 mg total fatty acids) |       |        |         |       |        |            |       |        |
| C14:0         | 0.55                                      | 0.60  | 0.03   | 0.49    | 0.52  | 0.03   | 0.49       | 0.56  | 0.02*  |
| C16:0         | 19.12                                     | 19.74 | 0.40   | 17.98   | 18.45 | 0.51   | 16.32      | 17.86 | 0.55   |
| C16:1 n-7     | 0.58                                      | 0.56  | 0.03   | 0.50    | 0.49  | 0.03   | 0.34       | 0.35  | 0.02   |
| C17:0         | 0.49                                      | 0.46  | 0.01   | 0.52    | 0.49  | 0.02   | 0.55       | 0.58  | 0.02   |
| C18:0         | 22.29                                     | 22.09 | 0.27   | 21.64   | 21.54 | 0.25   | 20.28      | 21.21 | 0.42   |
| C18:1 n-9     | 19.61                                     | 18.06 | 1.17   | 22.97   | 21.79 | 1.11   | 23.08      | 21.72 | 0.97   |
| C18:1 n-7     | 4.79                                      | 4.73  | 0.10   | 4.69    | 4.70  | 0.07   | 4.33       | 4.55  | 0.11   |
| C18:2 n-6     | 0.55                                      | 0.55  | 0.05   | 0.57    | 0.55  | 0.05   | 0.69       | 0.66  | 0.06   |
| C18:3 n-3     | 0.11                                      | 0.11  | 0.02   | 0.16    | 0.13  | 0.02   | 0.22       | 0.11  | 0.04*  |
| C20:0         | 0.20                                      | 0.15  | 0.02   | 0.23    | 0.37  | 0.14   | 0.26       | 0.21  | 0.04   |
| C20:1 n-9     | 1.38                                      | 1.23  | 0.26   | 1.90    | 1.65  | 0.29   | 3.87       | 3.25  | 0.54   |
| C20:2 n-6     | 0.56                                      | 0.48  | 0.04   | 0.57    | 0.59  | 0.07   | 0.50       | 0.44  | 0.02   |
| C20:3 n-6     | 1.23                                      | 1.10  | 0.04*  | 1.23    | 1.06  | 0.07   | 1.68       | 1.60  | 0.09   |
| C20:4 n-6     | 8.05                                      | 9.41  | 0.47*  | 6.92    | 7.79  | 0.30*  | 4.36       | 6.29  | 0.26** |
| C20:5 n-3     | 0.44                                      | 0.21  | 0.03** | 0.36    | 0.17  | 0.03** | 0.26       | 0.09  | 0.02** |
| C22:0         | 0.19                                      | 0.15  | 0.04   | 0.28    | 0.23  | 0.04   | 0.46       | 0.41  | 0.12   |
| C22:1 n-9     | 0.46                                      | 0.47  | 0.09   | 0.58    | 0.69  | 0.08   | 0.17       | 0.15  | 0.05   |
| C22:4 n-6     | 4.07                                      | 5.53  | 0.13** | 3.78    | 4.98  | 0.12** | 1.49       | 2.35  | 0.07** |
| C22:5 n-3     | 2.46                                      | 1.13  | 0.09** | 2.36    | 1.12  | 0.09** | 1.74       | 1.03  | 0.07** |
| C22:6 n-3     | 11.24                                     | 10.90 | 0.57   | 10.14   | 9.90  | 0.70   | 11.86      | 12.88 | 0.93   |

<sup>a</sup>Standard error of the mean, n=10, five steers and five heifers.

<sup>b</sup>Number of carbon atoms : number of carbon-carbon double bonds; “n” indicates number of carbon atoms removed from the methyl end to the first carbon-carbon double bond.

\*  $P < 0.05$ ; \*\*  $P < 0.01$ .

**Table S5.** Fatty acid profiles for bovine visual cortex, sensory cortex, and motor cortex.

| Region/tract: | Visual cortex                             |       |        | Sensory cortex |       |        | Motor cortex |       |        |
|---------------|-------------------------------------------|-------|--------|----------------|-------|--------|--------------|-------|--------|
| Supplement:   | Fish                                      | Palm  | SEM    | Fish           | Palm  | SEM    | Fish         | Palm  | SEM    |
| Fatty acid    | (mg fatty acid/ 100 mg total fatty acids) |       |        |                |       |        |              |       |        |
| C14:0         | 0.62                                      | 0.61  | 0.02   | 0.56           | 0.53  | 0.02   | 0.54         | 0.56  | 0.01   |
| C16:0         | 20.26                                     | 20.19 | 0.37   | 19.55          | 18.95 | 0.26   | 19.47        | 19.73 | 0.27   |
| C16:1 n-7     | 0.51                                      | 0.46  | 0.02*  | 0.50           | 0.43  | 0.02** | 0.49         | 0.46  | 0.06   |
| C17:0         | 0.44                                      | 0.43  | 0.02   | 0.46           | 0.46  | 0.01   | 0.47         | 0.44  | 0.01*  |
| C18:0         | 22.14                                     | 21.93 | 0.19   | 21.79          | 21.40 | 0.21   | 21.86        | 21.71 | 0.23   |
| C18:1 n-9     | 19.94                                     | 19.69 | 0.66   | 21.44          | 22.34 | 0.56   | 21.90        | 20.88 | 0.51   |
| C18:1 n-7     | 4.18                                      | 4.15  | 0.08   | 4.51           | 4.49  | 0.05   | 4.46         | 4.48  | 0.07   |
| C18:2 n-6     | 0.49                                      | 0.43  | 0.02   | 0.51           | 0.44  | 0.03   | 0.51         | 0.47  | 0.03   |
| C18:3 n-3     | 0.10                                      | 0.12  | 0.18   | 0.14           | 0.15  | 0.01   | 0.14         | 0.11  | 0.01** |
| C20:0         | 0.17                                      | 0.17  | 0.01   | 0.20           | 0.20  | 0.01   | 0.21         | 0.19  | 0.01   |
| C20:1 n-9     | 1.31                                      | 1.43  | 0.18   | 1.68           | 2.16  | 0.12*  | 1.82         | 1.76  | 0.13   |
| C20:2 n-6     | 0.79                                      | 0.65  | 0.05   | 0.74           | .074  | 0.04   | 0.75         | 0.66  | 0.05   |
| C20:3 n-6     | 0.77                                      | 0.66  | 0.02** | 0.81           | 0.69  | 0.03*  | 0.79         | 0.66  | 0.03** |
| C20:4 n-6     | 6.26                                      | 7.29  | 0.28*  | 5.85           | 6.30  | 0.24   | 5.63         | 6.68  | 0.19** |
| C20:5 n-3     | 0.43                                      | 0.19  | 0.04** | 0.35           | 0.17  | 0.02** | 0.34         | 0.17  | 0.02** |
| C22:0         | 0.18                                      | 0.21  | 0.03   | 0.25           | 0.32  | 0.02*  | 0.26         | 0.26  | 0.02   |
| C22:1 n-9     | 0.85                                      | 0.89  | 0.07   | 0.86           | 1.07  | 0.08*  | 0.88         | 0.91  | 0.08   |
| C22:4 n-6     | 2.92                                      | 4.30  | 0.11** | 2.78           | 3.93  | 0.15** | 2.62         | 3.96  | 0.08** |
| C22:5 n-3     | 2.09                                      | 0.94  | 0.10** | 1.89           | 0.80  | 0.08** | 1.78         | 0.83  | 0.05** |
| C22:6 n-3     | 13.51                                     | 12.49 | 0.45   | 12.79          | 11.18 | 0.40*  | 12.74        | 12.19 | 0.45   |

<sup>a</sup>Standard error of the mean, n=10, five steers and five heifers.

<sup>b</sup>Number of carbon atoms : number of carbon-carbon double bonds; “n” indicates number of carbon atoms removed from the methyl end to the first carbon-carbon double bond.

\*  $P < 0.05$ ; \*\*  $P < 0.01$ .

**Table S6.** Fatty acid profiles for bovine thalamus and hypothalamus

| Region/tract: | Thalamus                                  |       |        | Hypothalamus |       |        |
|---------------|-------------------------------------------|-------|--------|--------------|-------|--------|
| Supplement:   | Fish                                      | Palm  | SEM    | Fish         | Palm  | SEM    |
| Fatty acid    | (mg fatty acid/ 100 mg total fatty acids) |       |        |              |       |        |
| C14:0         | 0.39                                      | 0.40  | 0.03   | 0.42         | 0.51  | 0.04   |
| C16:0         | 17.77                                     | 16.97 | 0.49   | 18.22        | 19.06 | 0.4    |
| C16:1 n-7     | 0.37                                      | 0.33  | 0.03   | 0.38         | 0.39  | 0.02   |
| C17:0         | 0.53                                      | 0.54  | 0.02   | 0.47         | 0.45  | 0.02   |
| C18:0         | 20.48                                     | 20.16 | 0.25   | 20.33        | 20.02 | 0.33   |
| C18:1 n-9     | 25.61                                     | 26.19 | 1.13   | 24.73        | 22.76 | 0.91   |
| C18:1 n-7     | 4.79                                      | 4.79  | 0.04   | 4.68         | 4.69  | 0.09   |
| C18:2 n-6     | 0.39                                      | 0.35  | 0.03   | 0.35         | 0.38  | 0.04   |
| C18:3 n-3     | 0.21                                      | 0.20  | 0.03   | 0.11         | 0.13  | 0.02   |
| C20:0         | 0.28                                      | 0.29  | 0.02   | 0.25         | 0.24  | 0.02   |
| C20:1 n-9     | 2.66                                      | 3.405 | 0.38   | 2.34         | 1.95  | 0.24   |
| C20:2 n-6     | 0.69                                      | 0.61  | 0.04   | 1.03         | 1.02  | 0.15   |
| C20:3 n-6     | 0.97                                      | 0.91  | 0.04   | 0.96         | 0.87  | 0.03   |
| C20:4 n-6     | 5.35                                      | 6.03  | 0.40   | 5.84         | 7.16  | 0.40   |
| C20:5 n-3     | 0.31                                      | 0.19  | 0.02** | 0.50         | 0.24  | 0.05*  |
| C22:0         | 0.41                                      | 0.52  | 0.06   | 0.32         | 0.28  | 0.04   |
| C22:1 n-9     | 0.62                                      | 0.65  | 0.06   | 1.02         | 1.16  | 0.18   |
| C22:4 n-6     | 3.85                                      | 5.18  | 0.17** | 5.05         | 6.21  | 0.36   |
| C22:5 n-3     | 2.15                                      | 0.92  | 0.07** | 2.58         | 1.22  | 0.11** |
| C22:6 n-3     | 9.68                                      | 8.07  | 0.62   | 8.27         | 8.46  | 0.30   |

<sup>a</sup>Standard error of the mean, n=10, five steers and five heifers.

<sup>b</sup>Number of carbon atoms : number of carbon-carbon double bonds; “n” indicates number of carbon atoms removed from the methyl end to the first carbon-carbon double bond.

\*  $P < 0.05$ ; \*\*  $P < 0.01$ .
